# Supplementary material for: Cold-Inducible RNA Binding Protein Impedes Breast Tumor Growth in the PyMT Murine Model for Breast Cancer
Source: MDPI journal article supplement (doi:10.3390/biomedicines12020340), 2024-02-01
Supplement: s1 [file s1]

Supplemental Figures and Tables

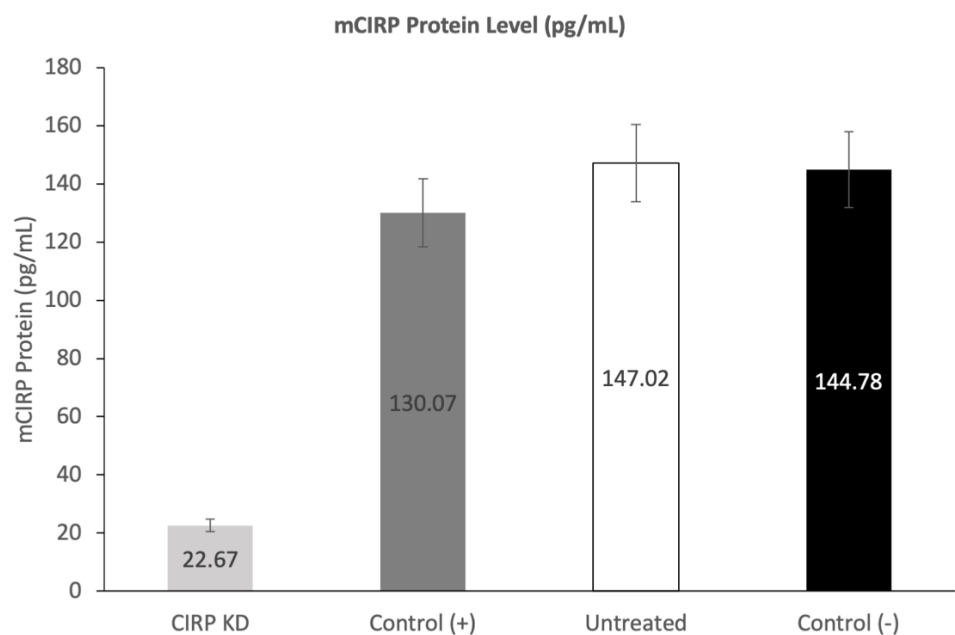

**Figure S1. CIRP Knockdown Efficiency.** Mouse CIRP protein was measured by ELISA and shown in picograms per milliliter. Cells were mixed with either positive (+) control (targeting the HPRT gene) crRNA RNP complex, negative (-) control crRNA RNP complex, CIRP crRNA RNP complex (CIRP Knockdown or KD), or lipofectamine only (untreated).

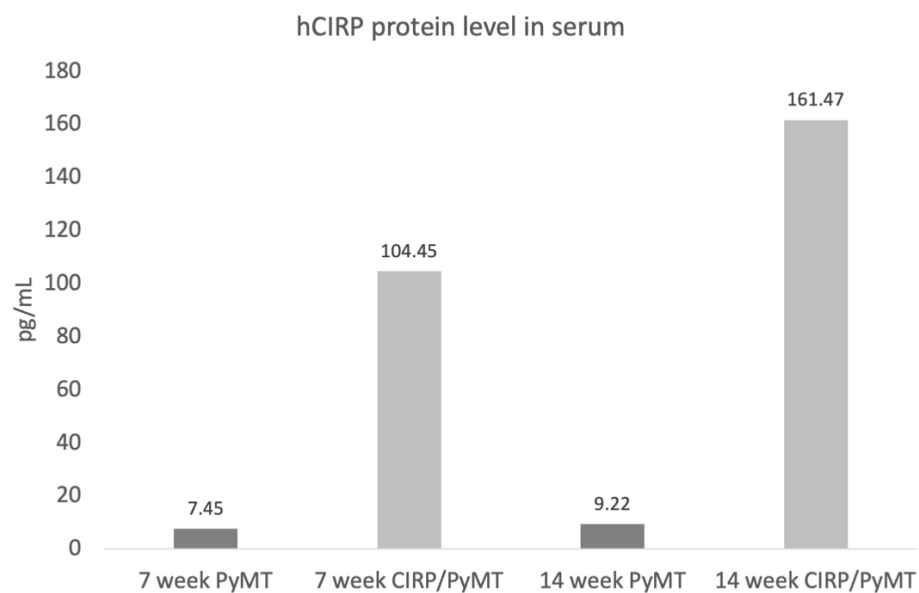

**Figure S2. Human CIRP Protein Level in Serum.** Human CIRP (hCIRP) protein in serum of the indicated mice (3-5 per genotype) was measured by ELISA and shown in picograms per milliliter.

| Table S1: Genotyping Primers |                                         |
|------------------------------|-----------------------------------------|
| Target Gene Name             | Primer Sequence                         |
| PyMT Forward                 | 5'- CGG CGG AGC GAG GAA CTG AC 3'       |
| PyMT Reverse                 | 5'- TCA GAA GAC TCG GCA GTC TTA -3'     |
| CIRP Forward                 | 5'- TAC TAT AGC AGC CGG AGT CAG AGT -3' |
| CIRP Reverse                 | 5'- AAC AGA TGG CTG GCA ACT AGA AGG -3' |

| Table S2: Description of Antibodies |                   |                |                                      |                     |
|-------------------------------------|-------------------|----------------|--------------------------------------|---------------------|
| Antibody                            | Source            | Catalog Number | Dilution                             | Stock Concentration |
| Ki67 (SP6)                          | NeoMarkers        | RM-9106-S0     | 1:300                                | Not Provided        |
| CD11b                               | Life Technologies | 25-0112-82     | 0.1µg/10 <sup>6</sup> cell per 100µl | 0.2mg/ml            |
| CD19                                | Life Technologies | 47-0193-82     | 0.1µg/10 <sup>6</sup> cell per 100µl | 0.2mg/ml            |
| F4/80                               | Life Technologies | 61-4801-82     | 0.8µg/10 <sup>6</sup> cell per 100µl | 0.2mg/ml            |
| CD8A                                | Life Technologies | 53-0081-82     | 0.4µg/10 <sup>6</sup> cell per 100µl | 0.5mg/ml            |
| Ly6G                                | Biolegend         | 127616         | 0.2µg/10 <sup>6</sup> cell per 100µl | 0.2mg/ml            |
| Ly6C                                | Biolegend         | 128014         | 0.2µg/10 <sup>6</sup> cell per 100µl | 0.5mg/ml            |
| CD3                                 | Biolegend         | 100351         | 0.4µg/10 <sup>6</sup> cell per 100µl | 0.2mg/ml            |
| CD4                                 | Biolegend         | 100552         | 0.2µg/10 <sup>6</sup> cell per 100µl | 0.2mg/ml            |

| Table S3: Sequences of Alt-R crRNAs (Guide RNAs) |                    |                                                                         |                 |
|--------------------------------------------------|--------------------|-------------------------------------------------------------------------|-----------------|
| Product                                          | Sequence Name      | Sequence                                                                | Number of Bases |
| Alt-R<br>CRISPR/Cas9<br>crRNA<br>10nmol          | Mm.Cas9.CIRBP.1.AA | Alt-R1/UCU UCU GAC<br>AAC CGG UCC CGG UUU<br>UAG AGC UAU GCU/Alt-<br>R2 | 36              |
| Alt-R<br>CRISPR/Cas9<br>crRNA<br>10nmol          | Mm.Cas9.CIRBP.1.AB | Alt-R1/CAG CUU CGA<br>CAC CAA CGA GCG UUU<br>UAG AGC UAU GCU/Alt-<br>R2 | 36              |
| Alt-R<br>CRISPR/Cas9<br>crRNA<br>10nmol          | Mm.Cas9.CIRBP.1.AC | Alt-R1/AGC GUC AUC<br>GAU AUU UUC AAG<br>UUU UAG AGC UAU<br>GCU/Alt-R2  | 36              |

| <b>Table S4: Tissue Supernatant Assays of 14-week Mammary Tumors</b> |             |                  |
|----------------------------------------------------------------------|-------------|------------------|
| <b>Cytokines</b>                                                     | <b>PyMT</b> | <b>CIRP/PyMT</b> |
| G-CSF                                                                | 14364.084   | 12896.117        |
| GM-CSF                                                               | 702.420     | 541.183          |
| IFN $\gamma$                                                         | 8.839       | 2.552            |
| IL1a                                                                 | 109.398     | 125.054          |
| IL1b                                                                 | 39.709      | 33.731           |
| IL2                                                                  | 4.630       | 2.577            |
| IL4                                                                  | < 3.2       | < 3.2            |
| IL5                                                                  | 13.450      | 6.837            |
| IL6                                                                  | 19232.755   | 10341.923        |
| IL7                                                                  | 23.289      | 15.191           |
| IL9                                                                  | 163.234     | 111.206          |
| IL10                                                                 | 34.320      | 20.508           |
| IL12 (p40)                                                           | < 3.2       | < 3.2            |
| IL12 (p70)                                                           | 37.748      | 26.729           |
| IL13                                                                 | 3.262       | 1.835            |
| IL15                                                                 | 26.194      | 13.853           |
| IL17                                                                 | 3.334       | 2.889            |
| IP10                                                                 | 214.545     | 234.483          |
| KC                                                                   | 8588.929    | 6032.330         |
| MCP-1                                                                | 3673.824    | 2405.679         |
| MIP1a                                                                | 180.150     | 114.504          |
| MIP1b                                                                | 177.447     | 106.123          |
| MIP2                                                                 | 4119.141    | 3524.152         |
| RANTES                                                               | 48.557      | 41.849           |
| TNF $\alpha$                                                         | 19.422      | 16.470           |

| Table S5: Serum Cytokines from Mice at 14-weeks of Age |          |           |
|--------------------------------------------------------|----------|-----------|
| Serum Cytokines                                        | PyMT     | CIRP/PyMT |
| G-CSF                                                  | 1677.933 | 1756.418  |
| GM-CSF                                                 | 25.314   | 25.438    |
| IFN $\gamma$                                           | < 3.2    | < 3.2     |
| IL1a                                                   | 134.535  | 74.809    |
| IL1b                                                   | 19.730   | 11.038    |
| IL2                                                    | 2.423    | 1.144     |
| IL4                                                    | < 3.2    | < 3.2     |
| IL5                                                    | 12.502   | 6.419     |
| IL6                                                    | 7.302    | 7.087     |
| IL7                                                    | 12.976   | 6.909     |
| IL9                                                    | 32.310   | 60.814    |
| IL10                                                   | 2.309    | 5.893     |
| IL12 (p40)                                             | < 3.2    | < 3.2     |
| IL12 (p70)                                             | 7.217    | 3.992     |
| IL13                                                   | < 3.2    | < 3.2     |
| IL15                                                   | 5.255    | 7.450     |
| IL17                                                   | 1.550    | 0.840     |
| IP10                                                   | 117.829  | 99.076    |
| KC                                                     | 29.170   | 19.041    |
| MCP-1                                                  | 49.925   | 29.854    |
| MIP1a                                                  | 59.983   | 38.541    |
| MIP1b                                                  | < 3.2    | < 3.2     |
| MIP2                                                   | 64.914   | 30.046    |
| RANTES                                                 | 7.642    | 5.846     |
| TNF $\alpha$                                           | 5.881    | 4.472     |
